# Supplementary material
Source: Springer Nature journal article supplement (https://www.springermedizin.de/resource/supplementary/12967_2012_1506_MOESM5_ESM.pdf/9574214)

**a**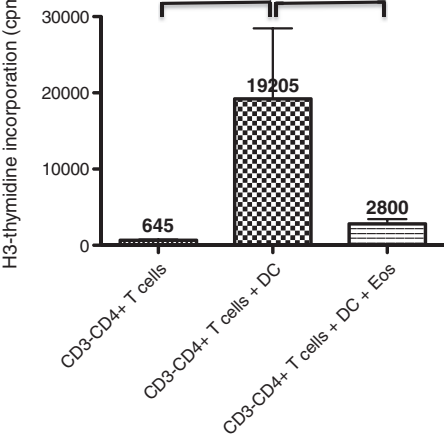**b**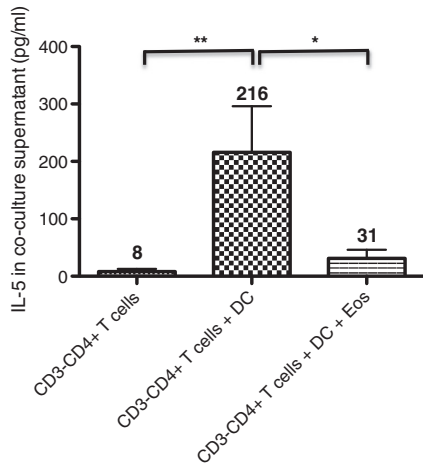**c**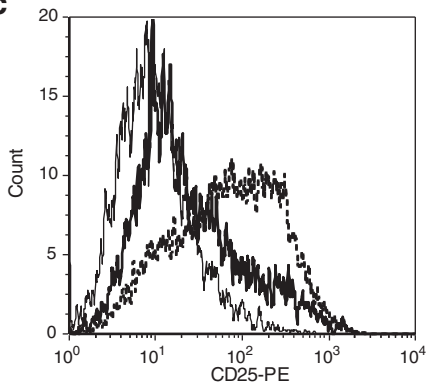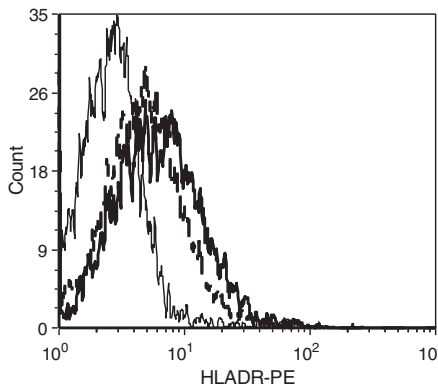

Supplement: MOESM5 [file 9574214]
